# Supplementary material for: Switch-like control of helicase processivity by single-stranded DNA binding protein
Source: eLife journal article supplement (doi:10.7554/elife.60515), 2021-03-19
Supplement: supp [file elife-60515-supp-v1.zip]

Archive with 17 entries (17 files):
- elife_poa_e60515_Figure_1_figure_supplement_1.pdf
- elife_poa_e60515_Figure_1_figure_supplement_2.pdf
- elife_poa_e60515_Figure_2_figure_supplement_1.pdf
- elife_poa_e60515_Figure_3_figure_supplement_1.pdf
- elife_poa_e60515_Figure_3_figure_supplement_2.pdf
- elife_poa_e60515_Figure_3_figure_supplement_3.pdf
- elife_poa_e60515_Figure_3_figure_supplement_4.pdf
- elife_poa_e60515_Figure_4_figure_supplement_1.pdf
- elife_poa_e60515_Figure_4_figure_supplement_2.pdf
- elife_poa_e60515_Figure_5_figure_supplement_1.pdf
- elife_poa_e60515_Figure_5_figure_supplement_2.pdf
- elife_poa_e60515_Transparent_Reporting_File.pdf
- elife_poa_e60515_Figure_2_source_data_1.xlsx
- elife_poa_e60515_Figure_3_source_data_1.xlsx
- elife_poa_e60515_Figure_4_source_data_1.xlsx
- elife_poa_e60515_Figure_5_source_data_1.xlsx
- elife_poa_e60515_Figure_6_source_data_1.xlsx
