# Supplementary material for: Switch-like control of helicase processivity by single-stranded DNA binding protein
Source: eLife journal article supplement (doi:10.7554/elife.60515), 2021-03-19
Supplement: supp [file elife-60515-supp-v1.zip › elife_poa_e60515_Figure_2_source_data_1.xlsx]

## Sheet: Fig2C
0 RPA2	2 nM RPA2	5 nM RPA2	10 nM RPA2	50 nM RPA2		[RPA2] (nM)	Mean proc (bp)	sem proc (bp)
13.5844	16.3285	17.3626	18.3692	5.26439		0	19.3206	1.5814
13.6667	10.3221	9.24445	29.3255	90		2	18.4728	1.1759
8.43979	7.37824	17.4957	27.7255	90		5	23.8198	2.2369
14.4854	17.1034	27.5146	20.4369	36.5214		10	34.2392	2.9497
8.07611	16.4289	16.4921	90	50.6436		50	35.4257	3.2065
9.99574	8.49719	15.1172	37.1423	51.8692
13.3588	16.3304	13.4112	65.3768	36.5823
9.2977	14.2514	18.8617	16.3668	53.4118
13.1795	13.6241	17.2641	55.5468	90
8.12428	19.5933	28.8298	51.8175	43.4084
5.45854	16.7383	32.6032	56.9347	8.68024
15.8991	22.1353	18.1988	21.024	11.0733
11.7402	14.3936	57.9509	51.8578	11.3467
18.7673	6.84065	19.8007	24.4403	11.8741
18.9624	5.19074	90	56.0722	11.362
15.1671	13.5443	10.5739	90	13.3616
13.9872	23.5801	14.6046	34.1349	11.0955
22.6431	13.6915	6.91246	90	14.3164
18.1583	18.9248	10.5201	21.2866	64.1117
19.3486	14.3163	11.4213	22.4092	13.0476
21.2566	8.15562	9.79036	57.9326	8.1998
15.454	13.7937	8.73563	16.2113	10.454
15.3426	13.5943	14.7631	90	9.71578
16.3319	19.4615	24.0596	14.5519	12.0505
11.712	12.4266	22.7718	13.4981	35.7688
20.7354	12.4996	39.5638	75.4561	15.5332
18.2029	18.0238	18.1979	26.0878	90
12.659	12.5566	8.75314	33.01	90
16.7182	7.35703	11.9179	23.024	21.3475
39.1201	12.8288	20.2629	27.1583	90
13.9396	14.3102	21.6182	45.325	13.5555
18.5888	6.56258	90	38.0379	14.2165
24.7711	17.3769	19.7862	45.4802	11.0031
12.1693	19.5226	55.6637	14.1658	11.72
18.3181	15.1647	17.7589	62.2182	13.2611
18.005	13.1711	17.2367	14.7995	10.3744
14.5875	16.1323	18.1584	18.8896	90
18.2453	15.9982	11.7795	17.395	11.8323
17.548	19.267	11.6087	18.8325	39.6987
23.0098	47.8649	13.6046	14.9069	39.3715
19.8516	16.1984	7.81116	22.3539	57.0924
18.5962	37.0392	19.9786	31.217	52.9211
17.8365	13.4394	39.5289	15.7457	20.1257
19.2151	23.1104	19.0985	17.1083	3.74645
16.8308	16.1589	20.2056	19.0778	18.0764
18.2372	14.3268	16.0012	28.0444	15.5328
90	53.7585	9.45446	14.985	34.3804
19.0906	17.0605	17.635	19.894	65.3828
12.34	7.20037	4.65538	13.7766	34.4477
16.0869	15.4671	21.8554	21.8298	21.1409
17.3183	17.3011	9.91323	20.7534	90
3.68923	14.5561	38.6384	19.2316	19.616
16.3251	15.6586	21.8897	90	43.6808
16.7624	15.246	21.1055	15.0003	90
14.3961	10.7364	11.727	29.5575	90
7.07007	12.3626	55.0436	30.888	90
19.163	12.3958	16.9902	15.8943	29.8844
8.27968	12.4588	16.9432	48.7826	29.0496
16.7385	15.2798	5.0489	18.5011	43.2099
6.75367	13.4991	4.55604	14.4633	19.4894
15.0576	61.127	6.33393		15.7461
6.90215	71.1736	4.4148		40.8338
20.1749	19.4977	74.8968		22.895
17.2377	12.9329	13.9844		18.5186
50.9936	16.9501	17.8174		14.9731
6.03759	14.2313	12.3882		12.9312
8.89655	15.9331	61.3772		58.9307
11.8722	18.6563	18.114		15.805
18.6429	26.824	20.0693		16.9952
19.0052	21.2426	90		19.9547
15.5394	18.3036	33.8758		90
15.8268	22.3909	50.9101		37.8708
9.95933	20.421	10.6128		14.8299
11.8271	14.4894	12.8439		9.64974
73.6506	17.1723	56.1609		90
90	10.5221	58.4894		11.6849
67.8751	5.93462	14.8202		12.1515
14.6496	7.47822	13.3065		11.1691
19.0763	10.8589	23.0565		11.7038
55.6866	16.5577			12.5675
20.0597	6.26139			51.8447
20.8281	19.1734			90
17.5911	13.5709
18.674	7.71974
6.84306	6.26986
21.3966	26.702
14.0128	18.8617
41.4241	90
13.3974	6.67395
18.6628	20.5835
7.86207	19.3463
8.22439	18.0116
21.766	22.8993
22.8505	16.7065
	26.4619
	13.7919
	18.5486
	15.6497
	38.1118
	16.7268
	16.7151
	15.6175
	28.1302
	12.6499
	16.06
	11.9909
	16.1427
	14.0058
	16.3359
	11.0633
	5.99593
	5.53779
	19.1077
	13.607
	54.8408
	19.1635
	69.9667
	14.302
	16.2005
	18.0786
	37.6736
	19.1242
	16.5458

## Sheet: Fig2D
BinCtr (bp)	Proc count
2.5	5
7.5	47
12.5	105
17.5	133
22.5	42
27.5	14
32.5	8
37.5	15
42.5	5
47.5	4
52.5	11
57.5	12
62.5	4
67.5	4
72.5	3
77.5	1
82.5	0
87.5	25

## Sheet: Fig2_FigSupp1
0 RPA2	10 nM RPA2		[RPA2] (nM)	Mean proc (bp)	sem proc (bp)
12.9138	13.5663		0	10.5009	0.3938
10.0066	11.3278		10	19.5533	1.8062
11.4681	10.9805
12.8532	11.0941
7.203	12.3943
11.7836	29.8293
14.3958	23.2665
12.8106	2.4241
9.8725	2.9396
13.5478	19.7052
14.0969	18.8268
6.7872	9.5893
6.5715	12.1355
9.0845	10.5195
10.6657	5.1477
7.2036	13.921
16.5353	12.1007
12.1844	17.7744
12.1135	16.58
13.3146	12.7678
5.6383	11.7626
12.9555	11.9128
11.4596	32.8554
11.4686	31.7761
13.35	13.6741
7.6017	13.3177
9.8132	11.3784
5.7452	11.4393
5.3046	13.2602
10.6998	11.0218
11.4321	12.525
11.572	14.8185
13.9521	13.4445
8.8326	13.0044
10.2587	13.9488
6.1481	12.9115
16.3676	25.7081
11.3975	23.4265
10.1516	16.7153
10.6383	25.4054
9.152	51.9249
4.1731	13.0521
9.799	35.9367
10.0744	20.1975
14.6245	39.8999
7.1297	35.7353
13.4008	15.1789
8.8496	38.0025
8.1503	20.4256
7.4904	47.1888
7.4515	50.1314
12.5006	90
11.9774	90
12.0746	24.5791
	15.7639
	13.7969
	15.6369
	14.8845
	13.1116
	14.2032
	14.7528
	15.9486
	16.3955
	15.0112
	7.2289
	10.6618
	8.257
	19.5744
	15.175
	12.2308
	18.5345
	6.3902
	13.5952
	12.342
