# Supplementary material for: Switch-like control of helicase processivity by single-stranded DNA binding protein
Source: eLife journal article supplement (doi:10.7554/elife.60515), 2021-03-19
Supplement: supp [file elife-60515-supp-v1.zip › elife_poa_e60515_Figure_3_source_data_1.xlsx]

## Sheet: Fig3C
[RPA2] (nM)	Melting event freq (1/s)	Error freq (1/s)
0	0.37891	0.10978
2	0.33776	0.09785
5	0.431	0.13002
10	0.78849	0.1554
50	1.1578	0.13466

## Sheet: Fig3_FigSupp1D
BinCtr (s)	Prob2nM	BinCtr (s)	Prob5nM	BinCtr (s)	Pro10nM	BinCtr (s)	Prob50nM
1	0.6735	0.25	0.5359	0.1	0.4628	0.015	0.2648
3	0.102	0.75	0.1099	0.3	0.1275	0.045	0.125
5	0.05102	1.25	0.08969	0.5	0.1009	0.075	0.08737
7	0.06122	1.75	0.07848	0.7	0.06416	0.105	0.08468
9	0.02041	2.25	0.04036	0.9	0.0479	0.135	0.06156
11	0.03061	2.75	0.03587	1.1	0.03849	0.165	0.05511
		3.25	0.0157	1.3	0.02737	0.195	0.0371
		3.75	0.02242	1.5	0.02481	0.225	0.03602
		4.25	0.01345	1.7	0.01796	0.255	0.03333
		4.75	0.006726	1.9	0.01283	0.285	0.02903
		5.25	0.008969	2.1	0.01027	0.315	0.02016
		5.75	0.008969	2.3	0.00941	0.345	0.02231
		6.25	0.01121	2.5	0.01283	0.375	0.01505
				2.7	0	0.405	0.01935
				2.9	0.006843	0.435	0.01317
				3.1	0	0.465	0.007527
				3.3	0.005133	0.495	0.01237
						0.525	0.009677
						0.555	0
						0.585	0.005914
						0.615	0.00672

## Sheet: Fig3_FigSupp1E
[RPA2] (nM)	kRPA2 (1/s)	Error kRPA2 (1/s)
2	0.16825	0.04975
5	0.58561	0.078676
10	1.4248	0.10671
50	5.5406	0.31075

## Sheet: Fig3_FigSupp2C
[RPA2] (nM)	MeltFreq (%)	Error MeltFreq (%)
0	1.8	1.7
2	1.3	1.6
5	2.9	1.8
10	5.2	1.6
50	7.5	1.1

## Sheet: Fig3_FigSupp3B
Force (pN)	FracTMelted (%)	Error FracTMelted (%)
8	0.13	0.09
9	0.01	0.01
10	1.87	0.76
11	1.78	0.62
12	6.96	2.23

## Sheet: Fig3_FigSupp4B
0 nM gp32	250 nM gp32		[gp32] (nM)	Mean proc (bp)	sem proc (bp)
7.0195	10.0063		0	7.051	0.2566
8.3686	13.4627		250	10.4826	0.7567
4.5376	4.4148
5.3821	4.9752
3.789	10.5729
4.3971	14.1729
3.3338	16.4478
3.2333	8.7724
3.2498	9.2559
3.8546	10.3512
5.1563	11.9107
8.551	9.4279
11.1652	15.2519
5.0174	13.9926
8.1396	6.4092
9.9383	7.8914
5.3412	6.2677
9.9744	6.7287
4.2239	18.3022
10.8101	9.7323
11.9671	10.816
10.3754	9.5325
6.412	12.4048
12.5887
18.4356
6.5187
5.8466
6.0498
10.1747
4.1953
15.3829
11.1146
9.704
9.6558
6.744
8.9274
5.8496
4.6616
9.9116
4.2379
5.2124
5.0499
6.4285
2.9971
10.7882
4.9407
11.2028
4.4054
5.5899
5.8575
4.5784
7.8927
6.1511
4.5976
9.5297
5.3112
9.911
6.6289
6.6604
5.1588
4.8446
10.6164
6.547
9.1766
6.3207
3.3797
5.5058
6.1483
4.8031
5.2726
10.289
5.1282
8.611
12.1193
5.5069
10.155
6.0612
4.9947
4.6794
12.6292
5.1092
10.4251
5.1393
7.1384
5.2956
7.5515
11.5725
9.1865
4.2104
10.0775
8.6619
5.4525
12.3279
11.2154
4.6387
6.4146
7.5333
5.5081
5.8916
5.4646
8.9504
5.7165
5.5487
3.7172
4.6807
2.1771
4.8654
4.5643
8.5478
3.0815
11.558
11.8093
3.6357
4.484
4.4649
0.3463
2.2283
5.8982
3.4873
5.7589
10.7503
3.4687
4.4942
4.9185
5.0318
14.3214
12.0016
5.8544
10.6547
7.2144
6.881
10.9551
6.1155
13.1695
9.1629
7.4974
7.1746
6.2225
5.24
5.3047
7.5014
