# Supplementary material for: Switch-like control of helicase processivity by single-stranded DNA binding protein
Source: eLife journal article supplement (doi:10.7554/elife.60515), 2021-03-19
Supplement: supp [file elife-60515-supp-v1.zip › elife_poa_e60515_Figure_4_source_data_1.xlsx]

## Sheet: Fig4B
[RPA2] (nM)	HighProcFract	Error HighProcFract
0	0.085106	0.028781
2	0.11382	0.028636
5	0.22785	0.047191
10	0.48333	0.064514
50	0.45122	0.054952

## Sheet: Fig4_FigSupp1AB
Hairpin pos (bp)	LowProcVel (bp/s)	sem LowProcVel (bp/s)	Hairpin pos (bp)	HighProcVel (bp/s)	sem HighProcVel (bp/s)
0	2.31594	0.61889	0	3.24904	1.0621
1	3.90347	0.48523	1	6.70589	1.1611
2	5.9978	0.74089	2	10.2021	1.7269
3	5.17561	0.87226	3	5.71535	2.1264
4	5.35941	0.69764	4	10.7113	1.8368
5	2.9852	0.43139	5	4.13751	1.0587
6	2.57622	0.40223	6	2.409	0.82496
7	1.55641	0.32332	7	2.93267	0.57007
8	0.986848	0.27011	8	1.48364	0.47349
9	1.02671	0.22894	9	1.13268	0.38691
10	0.688131	0.22653	10	1.78528	0.34333
11	-0.122991	0.20897	11	1.39348	0.44835
12	0.0479882	0.22107	12	0.720481	0.36758
13	0.0908113	0.2746	13	1.3055	0.36057
14	-0.0658562	0.39464	14	1.65124	0.46805
15	-0.27559	0.50916	15	2.3859	0.77707
16	1.4555	1.0847	16	3.8973	1.0707
17	-1.87004	1.9484	17	4.91063	1.61
18	3.91073	3.7917	18	9.32566	1.8831
19	-0.253195	3.544	19	6.11078	1.6549
20	-2.01057	2.1996	20	6.04122	1.4344
21	2.63079	3.1849	21	5.82997	1.5832
			22	5.30274	1.7741
			23	9.37532	1.75
			24	9.86603	1.9252
			25	10.4279	2.0733
			26	4.42584	1.8562

## Sheet: Fig4_FigSupp2B
[RPA2] (nM)	LowProcDur (s)	Error LowProcDur (s)	HighProcDur (s)	Error HighProcDur (s)	AllDur (s)	Error AllDur (s)
0	8.367	0.089823	27.8675	5.4203	10.0266	1.0868
2	8.1566	0.55207	21.0431	3.6537	9.6233	0.73369
5	6.1185	0.71841	25.7521	3.6699	10.592	1.3582
10	6.923	0.6608	19.3381	1.9948	12.9236	1.2961
50	5.6605	0.98447	33.4605	4.0744	18.2044	2.4456
