# Supplementary material for: Switch-like control of helicase processivity by single-stranded DNA binding protein
Source: eLife journal article supplement (doi:10.7554/elife.60515), 2021-03-19
Supplement: supp [file elife-60515-supp-v1.zip › elife_poa_e60515_Figure_5_source_data_1.xlsx]

## Sheet: Fig5B
wtXPD	wtXPD+10nM RPA2	XPDH202A	XPDH202A+10nM RPA2		Processivity
13.5844	18.3692	68.5925	11.2205			wtXPD	wtXPD+10nM RPA2	XPDH202A	XPDH202A+10nM RPA2
13.6667	29.3255	37.7282	11.1817		mean	19.3206	34.2392	49.721	2.8715
8.4398	27.7255	39.8124	9.0431		s.e.m.	1.5814	2.9497	42.1442	3.5443
14.4854	20.4369	51.0724	12.2044
8.0761	90	44.7187	26.9408
9.9957	37.1423	57.4366	21.062		High-processivity fraction
13.3588	65.3768	90	46.4607			wtXPD	wtXPD+10nM RPA2	XPDH202A	XPDH202A+10nM RPA2
9.2977	16.3668	30.4793	90		fraction	0.0851	0.4833	0.626	0.5443
13.1795	55.5468	28.5478	90		s.e.	0.0301	0.0699	0.0462	0.0549
8.1243	51.8175	68.6384	27.8359
5.4585	56.9347	55.6094	47.2215
15.8991	21.024	47.6744	12.261
11.7402	51.8578	15.7668	12.0009
18.7673	24.4403	16.1229	15.9418
18.9624	56.0722	20.2884	12.0283
15.1671	90	26.0672	17.7873
13.9872	34.1349	23.0647	26.7647
22.6431	90	90	20.886
18.1583	21.2866	20.0588	46.2846
19.3486	22.4092	14.9983	90
21.2566	57.9326	90	75.536
15.454	16.2113	90	79.1753
15.3426	90	20.7765	90
16.3319	14.5519	61.9201	13.8639
11.712	13.4981	53.7739	90
20.7354	75.4561	36.8774	13.2786
18.2029	26.0878	34.0339	9.9384
12.659	33.01	90	56.6494
16.7182	23.024	75.4973	58.3592
39.1201	27.1583	90	29.0189
13.9396	45.325	59.5723	90
18.5888	38.0379	17.569	28.9831
24.7711	45.4802	13.5165	58.9243
12.1693	14.1658	23.045	89.2139
18.3181	62.2182	18.4633	90
18.005	14.7995	20.7766	32.5776
14.5875	18.8896	17.2124	89.0478
18.2453	17.395	13.6062	12.5119
17.548	18.8325	16.1666	90
23.0098	14.9069	54.9139	90
19.8516	22.3539	15.0224	90
18.5962	31.217	16.0286	15.0419
17.8365	15.7457	12.2852	90
19.2151	17.1083	24.1668	90
16.8308	19.0778	18.5255	90
18.2372	28.0444	19.7619	90
90	14.985	15.6436	89.6776
19.0906	19.894	12.8796	16.3061
12.34	13.7766	14.2878	15.5051
16.0869	21.8298	90	25.8791
17.3183	20.7534	17.7368	20.6122
3.6892	19.2316	16.1445	15.175
16.3251	90	12.114	9.3083
16.7624	15.0003	25.6895	11.1772
14.3961	29.5575	23.3366	19.0002
7.0701	30.888	18.0475	15.6562
19.163	15.8943	81.4813	12.8314
8.2797	48.7826	90	23.8227
16.7385	18.5011	90	49.0172
6.7537	14.4633	10.4296	9.5408
15.0576		15.932	9.748
6.9021		20.4125	8.9293
20.1749		64.3629	17.6155
17.2377		90	15.9892
50.9936		90	30.4257
6.0376		19.7144	19.6447
8.8966		90	42.5213
11.8722		90	62.8309
18.6429		90	90
19.0052		32.9138	90
15.5394		90	60.2245
15.8268		90	15.7017
9.9593		90	45.6522
11.8271		90	61.6531
73.6506		90	15.5758
90		90	40.35
67.8751		90	13.5219
14.6496		90	41.142
19.0763		78.5258	15.109
55.6866		90
20.0597		76.2991
20.8281		90
17.5911		75.2595
18.674		73.1668
6.8431		52.4305
21.3966		90
14.0128		90
41.4241		90
13.3974		90
18.6628		8.6383
7.8621		28.2066
8.2244		23.7476
21.766		13.425
22.8505		61.3378
		14.789
		90
		90
		18.1604
		27.2344
		90
		12.074
		37.0251
		16.7946
		17.0829
		68.0416
		90
		52.8771
		32.2278
		17.2997
		25.2194
		20.0311
		22.4608
		26.2932
		15.8811
		15.3081
		90
		90
		90
		25.9393
		90
		90
		28.5918
		90

## Sheet: Fig5_FigSupp1A-B
wtXPD	wtXPD+10nM RPA2	XPDH202A	XPDH202A+10nM RPA2			Processivity
12.9138	13.5663	18.1621	5.6324				wtXPD	wtXPD+10nM RPA2	XPDH202A	XPDH202A+10nM RPA2
10.0066	11.3278	14.5266	4.7065			mean	10.5009	19.5533	18.2293	16.9704
11.4681	10.9805	13.8168	15.0585			s.e.m.	0.3938	1.8062	2.0465	1.7876
12.8532	11.0941	10.6744	17.3731
7.203	12.3943	12.6822	9.0871
11.7836	29.8293	15.3571	13.2127			High-processivity fraction
14.3958	23.2665	15.9349	9.9558				wtXPD	wtXPD+10nM RPA2	XPDH202A	XPDH202A+10nM RPA2
12.8106	2.4241	15.531	14.7899			fraction	0	0.1892	0.0526	0.0597
9.8725	2.9396	19.3585	14.8184			s.e.	0	0.0457	0.0369	0.0299
13.5478	19.7052	15.3864	19.8253
14.0969	18.8268	16.3008	12.6291
6.7872	9.5893	16.8057	14.8481
6.5715	12.1355	10.9636	10.9105
9.0845	10.5195	11.4975	13.1813
10.6657	5.1477	15.1046	19.3835
7.2036	13.921	24.7075	16.0472
16.5353	12.1007	21.4193	12.6351
12.1844	17.7744	15.795	12.0357
12.1135	16.58	14.4532	14.8468
13.3146	12.7678	16.6904	15.0331
5.6383	11.7626	14.4817	12.8918
12.9555	11.9128	16.6979	15.0229
11.4596	32.8554	21.0163	15.3896
11.4686	31.7761	19.6462	12.2965
13.35	13.6741	14.5889	11.6044
7.6017	13.3177	17.7449	11.0117
9.8132	11.3784	19.1321	13.4266
5.7452	11.4393	16.5655	16.4363
5.3046	13.2602	12.5682	14.6561
10.6998	11.0218	17.8467	15.713
11.4321	12.525	15.2553	14.3278
11.572	14.8185	17.461	14.3111
13.9521	13.4445	90	15.7417
8.8326	13.0044	11.7335	13.699
10.2587	13.9488	8.7187	15.6055
6.1481	12.9115	15.7584	13.0695
16.3676	25.7081	16.9572	90
11.3975	23.4265	31.3736	59.5204
10.1516	16.7153		90
10.6383	25.4054		17.7846
9.152	51.9249		14.0441
4.1731	13.0521		21.3209
9.799	35.9367		36.7702
10.0744	20.1975		9.8673
14.6245	39.8999		13.1541
7.1297	35.7353		11.7849
13.4008	15.1789		11.6509
8.8496	38.0025		12.2505
8.1503	20.4256		12.8503
7.4904	47.1888		10.4725
7.4515	50.1314		11.7988
12.5006	90		15.2347
11.9774	90		18.7554
12.0746	24.5791		11.363
	15.7639		11.079
	13.7969		13.5567
	15.6369		15.678
	14.8845		12.1808
	13.1116		9.169
	14.2032		14.9446
	14.7528		18.5098
	15.9486		10.4752
	16.3955		10.7371
	15.0112		14.1309
	7.2289		14.167
	10.6618		16.1655
	8.257		16.3894
	19.5744
	15.175
	12.2308
	18.5345
	6.3902
	13.5952
	12.342
