# Supplementary material for: Switch-like control of helicase processivity by single-stranded DNA binding protein
Source: eLife journal article supplement (doi:10.7554/elife.60515), 2021-03-19
Supplement: supp [file elife-60515-supp-v1.zip › elife_poa_e60515_Figure_6_source_data_1.xlsx]

## Sheet: Fig6C
Time (s)	Prob0nM	Prob2nM	Prob5nM	Prob10nM	Prob50nM
1	0	0	0	0	0
2	0	0	0	0	0
3	0	0	0	0.15	0.0952381
4	0	0	0	0.2	0.333333
5	0	0	0.037037	0.3	0.428571
6	0.05	0	0.0740741	0.35	0.47619
7	0.05	0.0526316	0.0740741	0.45	0.47619
8	0.05	0.0526316	0.0740741	0.45	0.666667
9	0.05	0.0526316	0.0740741	0.45	0.666667
10	0.05	0.0526316	0.148148	0.55	0.714286
11	0.05	0.0526316	0.185185	0.55	0.809524
12	0.05	0.105263	0.296296	0.55	0.809524
13	0.1	0.105263	0.296296	0.55	0.809524
14	0.1	0.105263	0.296296	0.55	0.809524
15	0.1	0.105263	0.296296	0.55	0.809524
16	0.1	0.105263	0.296296	0.55	0.809524
17	0.1	0.105263	0.296296	0.55	0.809524
18	0.1	0.105263	0.296296	0.55	0.809524
19	0.1	0.157895	0.296296	0.55	0.809524
20	0.1	0.157895	0.296296	0.55	0.809524
21	0.1	0.210526	0.296296	0.6	0.857143
22	0.15	0.210526	0.333333	0.6	0.857143
23	0.15	0.263158	0.333333	0.65	0.904762
24	0.15	0.263158	0.37037	0.65	0.904762
25	0.15	0.263158	0.407407	0.65	0.904762
26	0.15	0.263158	0.407407	0.7	0.904762
27	0.15	0.263158	0.407407	0.7	0.904762
28	0.15	0.315789	0.407407	0.7	0.904762
29	0.15	0.315789	0.407407	0.7	0.904762
30	0.15	0.315789	0.407407	0.7	0.904762
31	0.15	0.368421	0.407407	0.7	0.904762
32	0.15	0.368421	0.407407	0.7	0.904762
33	0.15	0.368421	0.407407	0.7	0.904762
34	0.15	0.368421	0.407407	0.7	0.904762
35	0.15	0.368421	0.407407	0.7	0.904762
36	0.15	0.368421	0.407407	0.7	0.904762
37	0.15	0.368421	0.407407	0.7	0.952381
38	0.15	0.368421	0.407407	0.7	0.952381
39	0.15	0.368421	0.407407	0.7	0.952381
40	0.15	0.368421	0.407407	0.7	0.952381
41	0.15	0.368421	0.407407	0.7	0.952381
42	0.15	0.368421	0.407407	0.7	0.952381
43	0.15	0.368421	0.407407	0.7	0.952381
44	0.15	0.368421	0.407407	0.7	0.952381
45	0.15	0.368421	0.407407	0.7	0.952381
46	0.15	0.368421	0.407407	0.7	0.952381
47	0.15	0.368421	0.407407	0.7	0.952381
48	0.15	0.368421	0.407407	0.7	0.952381
49	0.15	0.368421	0.444444	0.7	0.952381
50	0.15	0.368421	0.444444	0.7	0.952381
51	0.2	0.368421	0.444444	0.7	0.952381
52	0.2	0.368421	0.444444	0.7	0.952381
53	0.2	0.368421	0.444444	0.7	0.952381
54	0.2	0.368421	0.444444	0.7	0.952381
55	0.2	0.368421	0.444444	0.7	0.952381
56	0.2	0.368421	0.444444	0.7	0.952381
57	0.2	0.368421	0.444444	0.7	0.952381
58	0.2	0.368421	0.444444	0.7	0.952381
59	0.2	0.368421	0.444444	0.7	0.952381
60	0.2	0.368421	0.444444	0.7	0.952381
61	0.2	0.368421	0.444444	0.7	0.952381
62	0.2	0.368421	0.444444	0.7	0.952381
63	0.2	0.421053	0.444444	0.7	0.952381
64	0.2	0.421053	0.444444	0.7	0.952381
65	0.2	0.421053	0.444444	0.7	0.952381
66	0.2	0.473684	0.444444	0.7	0.952381
67	0.2	0.473684	0.444444	0.7	0.952381
68	0.2	0.473684	0.444444	0.7	0.952381
69	0.2	0.473684	0.444444	0.7	0.952381
70	0.2	0.473684	0.444444	0.7	0.952381
71	0.2	0.473684	0.444444	0.7	0.952381
72	0.2	0.473684	0.444444	0.7	0.952381
73	0.2	0.473684	0.444444	0.7	0.952381
74	0.2	0.473684	0.444444	0.7	0.952381
75	0.2	0.473684	0.444444	0.7	0.952381
76	0.2	0.473684	0.444444	0.7	0.952381
77	0.2	0.473684	0.444444	0.7	0.952381
78	0.2	0.473684	0.444444	0.7	0.952381
79	0.2	0.473684	0.444444	0.7	0.952381
80	0.2	0.473684	0.444444	0.7	0.952381
81	0.2	0.473684	0.444444	0.7	0.952381
82	0.2	0.473684	0.444444	0.7	0.952381
83	0.2	0.473684	0.444444	0.7	0.952381
84	0.2	0.473684	0.444444	0.7	0.952381
85	0.2	0.473684	0.444444	0.7	0.952381
86	0.2	0.473684	0.444444	0.7	0.952381
87	0.2	0.473684	0.444444	0.7	0.952381
88	0.2	0.473684	0.444444	0.7	0.952381
89	0.2	0.473684	0.444444	0.7	0.952381
90	0.2	0.473684	0.444444	0.7	0.952381
91	0.2	0.473684	0.444444	0.7	0.952381
92	0.2	0.473684	0.444444	0.7	0.952381
93	0.2	0.473684	0.444444	0.7	0.952381
94	0.2	0.473684	0.444444	0.7	0.952381
95	0.2	0.473684	0.444444	0.7	0.952381
96	0.2	0.473684	0.444444	0.7	0.952381
97	0.2	0.473684	0.444444	0.7	0.952381
98	0.2	0.473684	0.444444	0.7	0.952381
99	0.2	0.473684	0.444444	0.7	0.952381
100	0.2	0.473684	0.444444	0.7	0.952381
101	0.2	0.473684	0.444444	0.7	0.952381
102	0.2	0.473684	0.444444	0.7	0.952381
103	0.2	0.473684	0.444444	0.7	0.952381
104	0.2	0.473684	0.444444	0.7	0.952381
105	0.2	0.473684	0.444444	0.7	0.952381
106	0.2	0.473684	0.444444	0.7	0.952381
107	0.2	0.473684	0.444444	0.7	0.952381
108	0.2	0.473684	0.444444	0.7	0.952381
109	0.2	0.473684	0.444444	0.7	0.952381
110	0.2	0.473684	0.444444	0.7	0.952381
111	0.2	0.473684	0.444444	0.7	0.952381
112	0.2	0.473684	0.444444	0.7	0.952381
113	0.2	0.473684	0.444444	0.7	0.952381
114	0.2	0.473684	0.444444	0.7	0.952381
115	0.2	0.473684	0.444444	0.7	0.952381
116	0.2	0.473684	0.444444	0.7	0.952381
117	0.2	0.473684	0.444444	0.7	0.952381
118	0.2	0.473684	0.444444	0.7	0.952381
119	0.2	0.473684	0.444444	0.7	0.952381
120	0.2	0.473684	0.444444	0.7	0.952381

## Sheet: Fig6D
[RPA2] (nM)	k1 (1/s)	error k1 (1/s)
0	0.019715	0.0057658
2	0.058546	0.017043
5	0.064719	0.018845
10	0.20047	0.058985
50	1.12521	0.38731

## Sheet: Fig6_FigSupp1
[RPA2] (nM)	HighProcFract	Error HighProcFract
0	0.11847	0.019076
60	0.175	0.060078
100	0.14286	0.028862
200	0.15385	0.057774
