# Supplementary figures and images for: Switch-like control of helicase processivity by single-stranded DNA binding protein
Source: eLife journal article supplement (doi:10.7554/elife.60515), 2021-03-19

**a**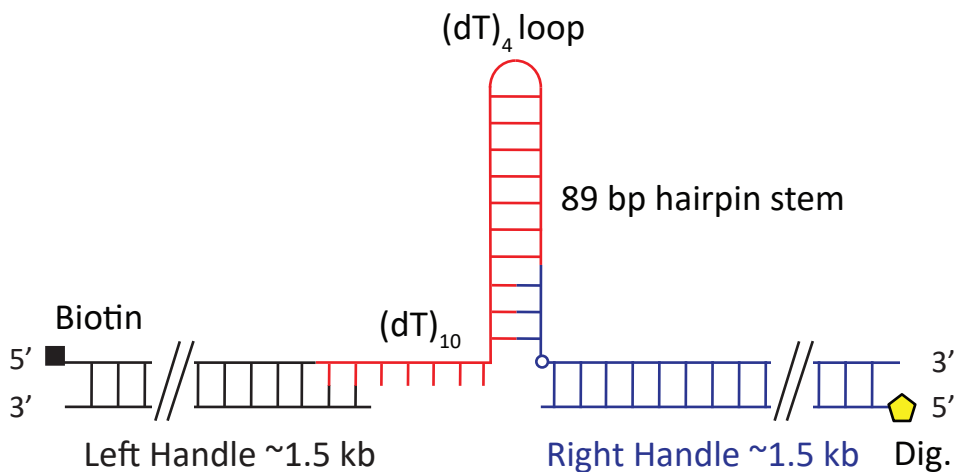**b**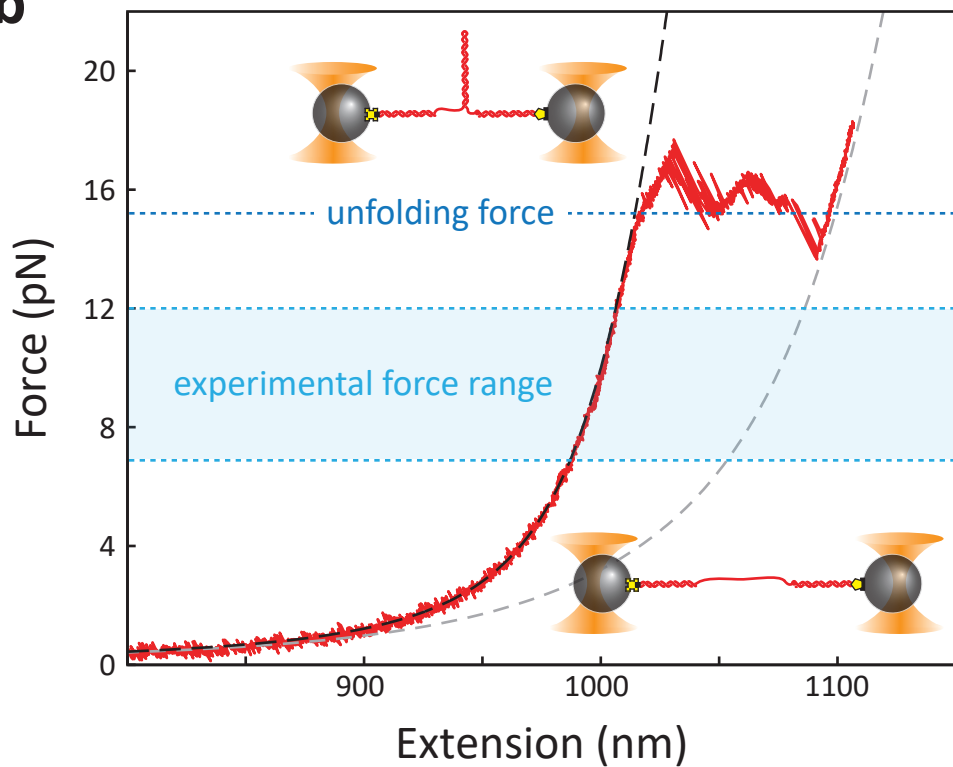

Supplement: supp [file elife-60515-supp-v1.zip › elife_poa_e60515_Figure_1_figure_supplement_1.pdf]

**a**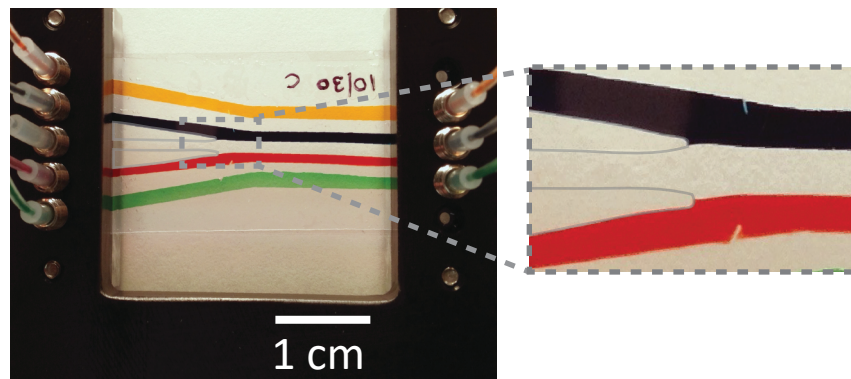**b**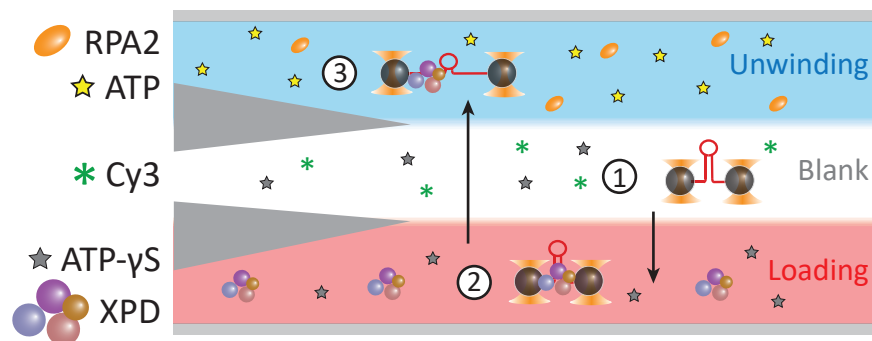**c**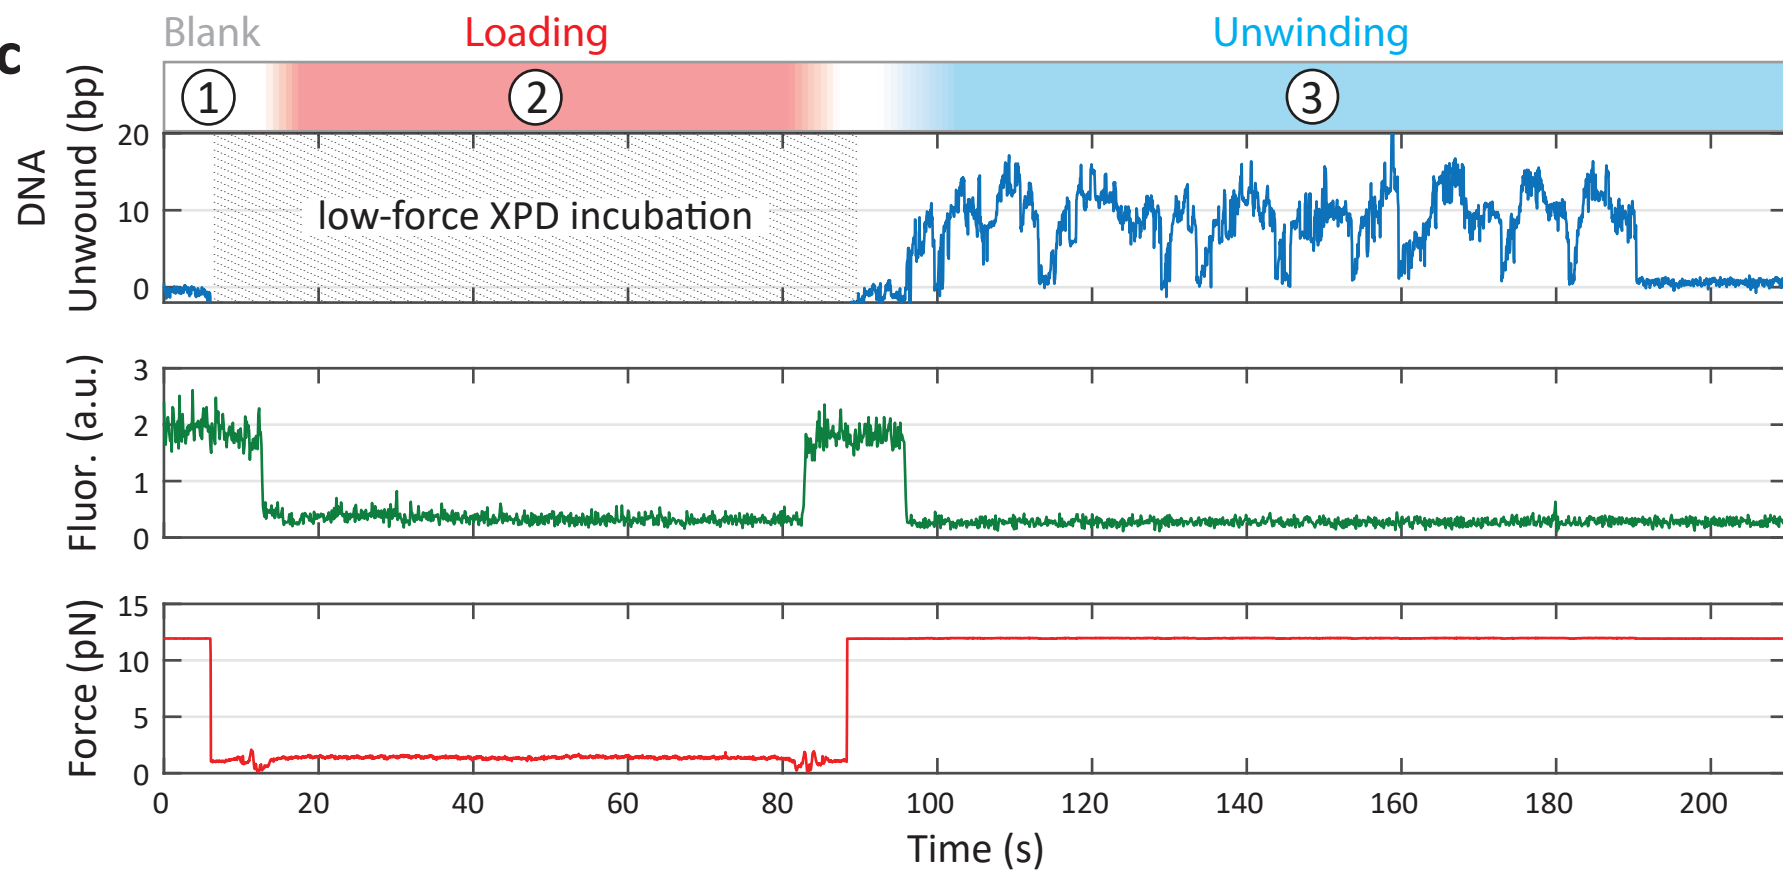

Supplement: supp [file elife-60515-supp-v1.zip › elife_poa_e60515_Figure_1_figure_supplement_2.pdf]

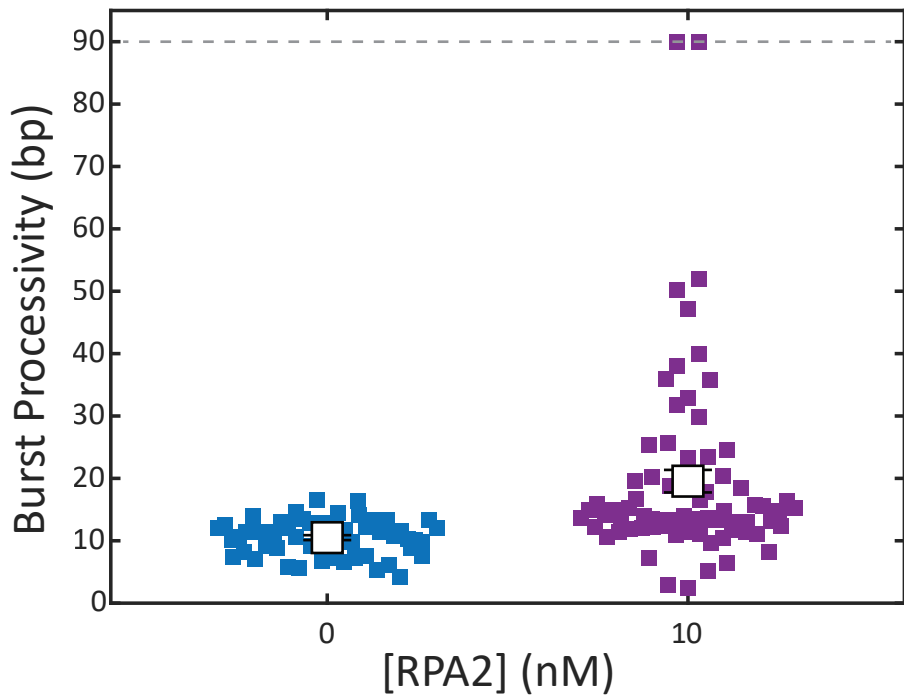

Supplement: supp [file elife-60515-supp-v1.zip › elife_poa_e60515_Figure_2_figure_supplement_1.pdf]

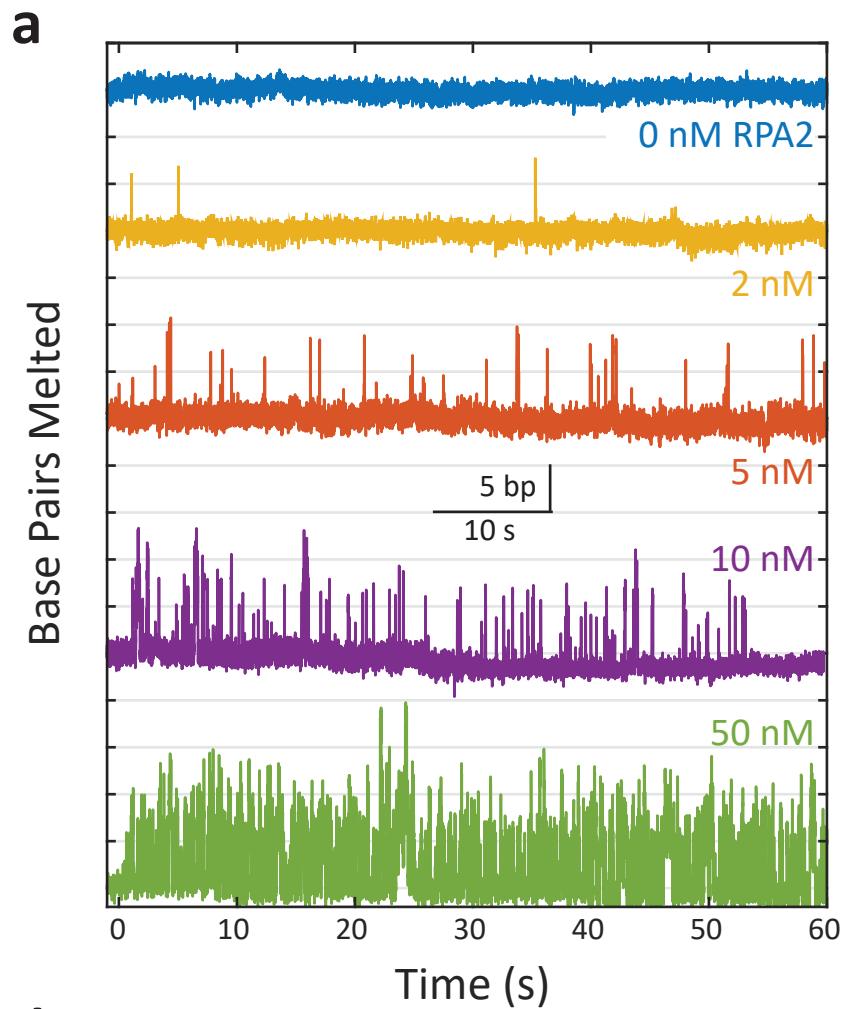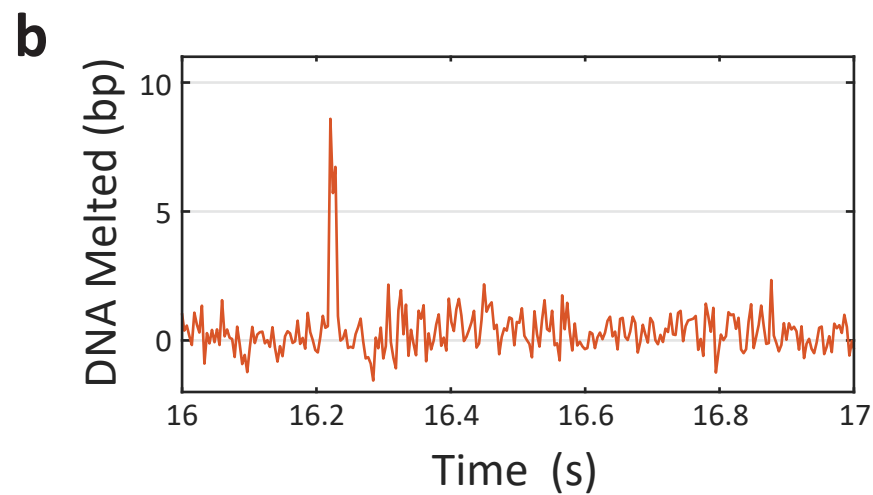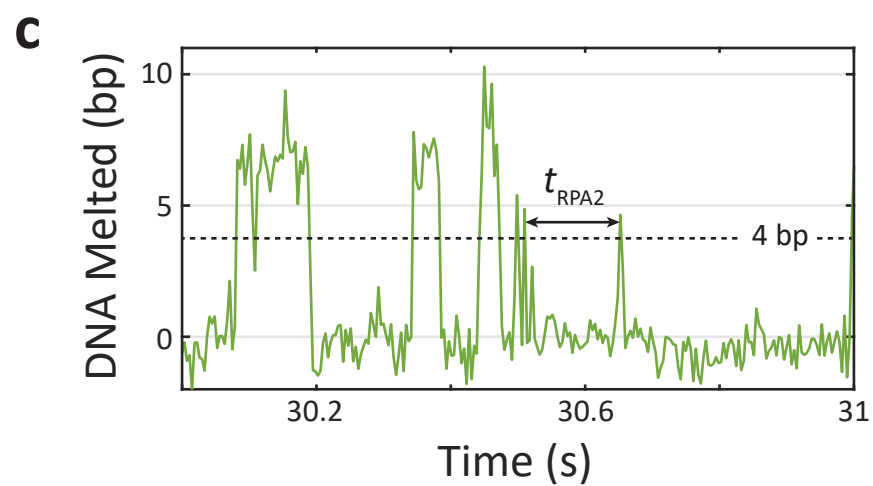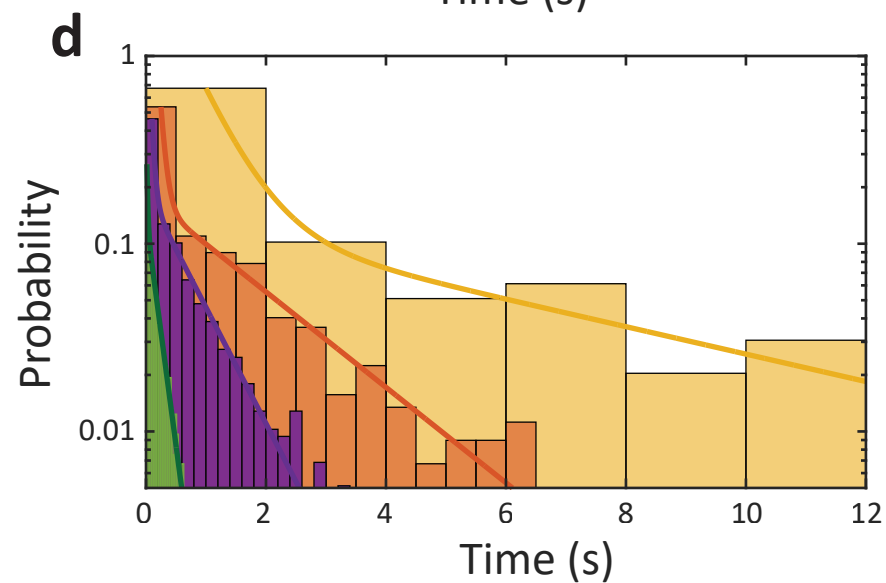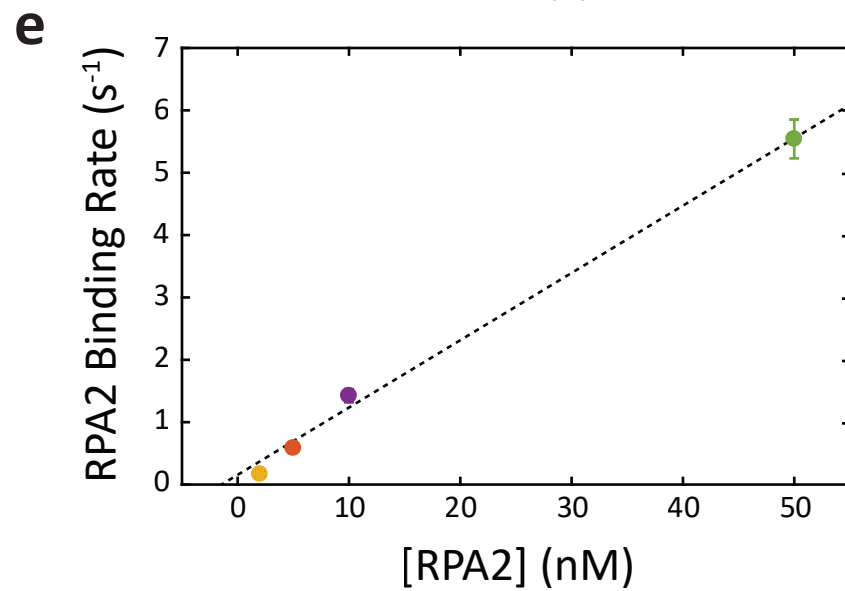

Supplement: supp [file elife-60515-supp-v1.zip › elife_poa_e60515_Figure_3_figure_supplement_1.pdf]

**a**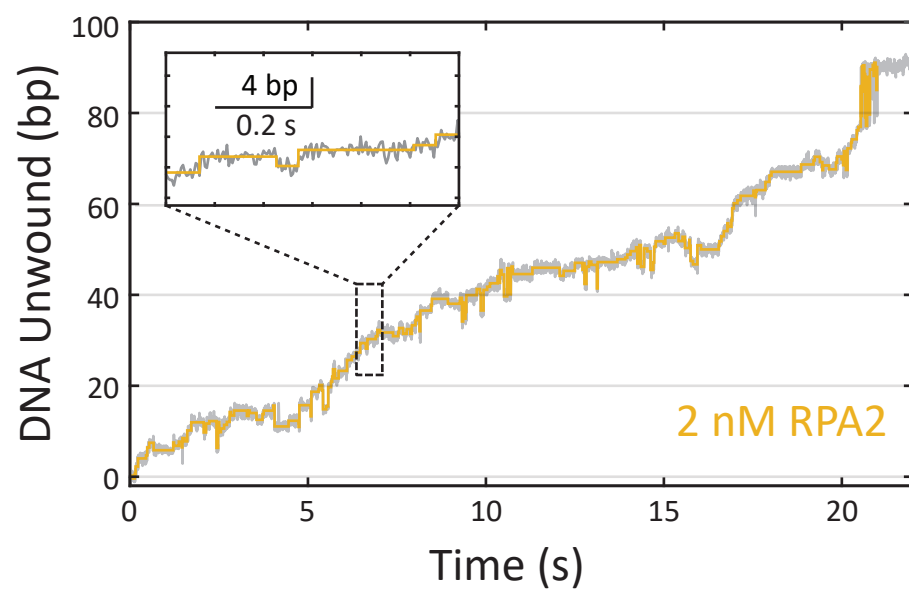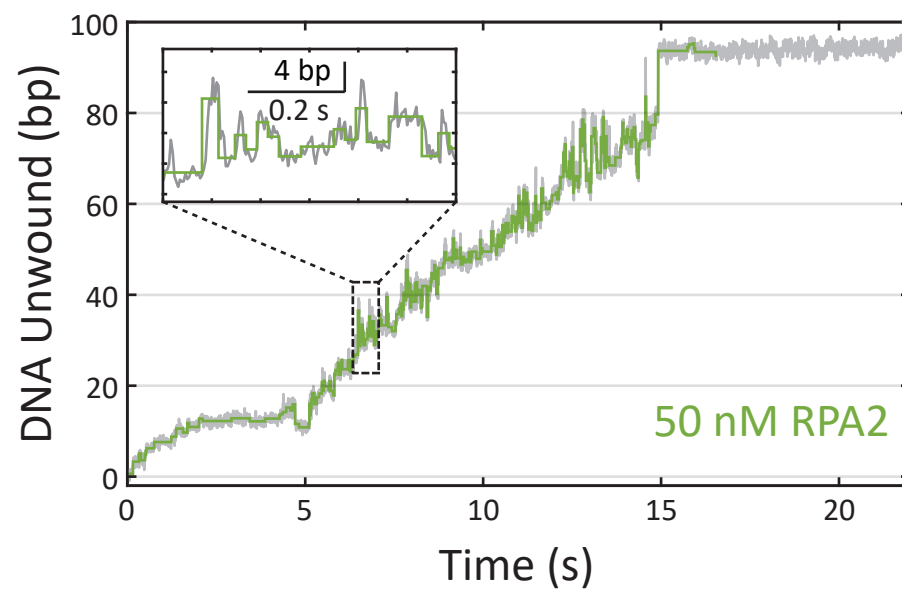**b**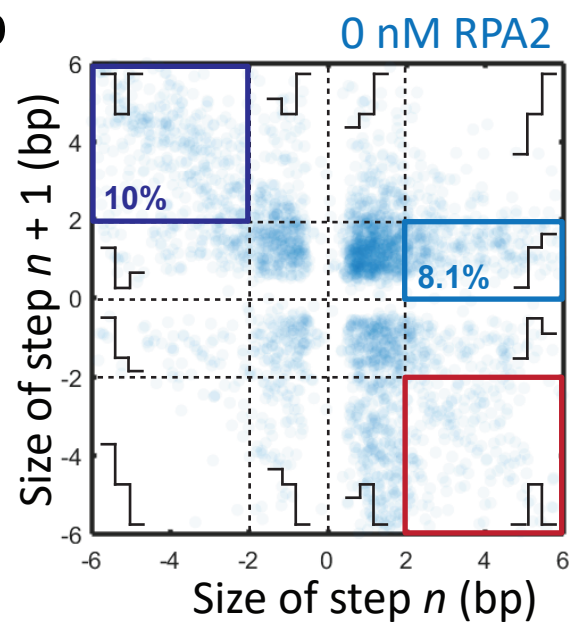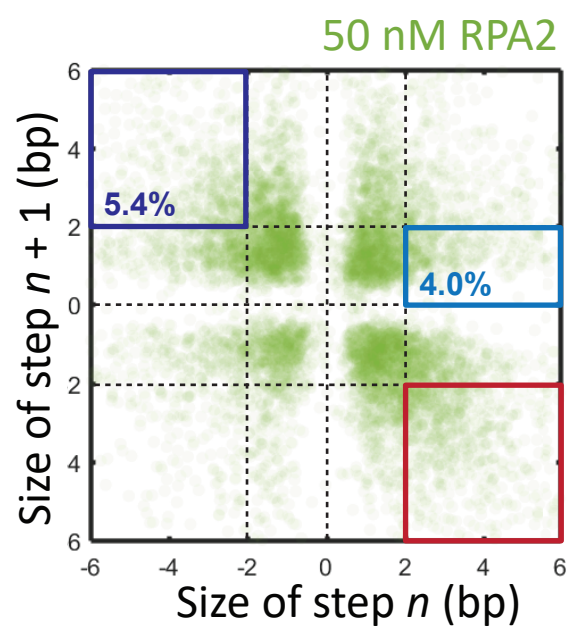**c**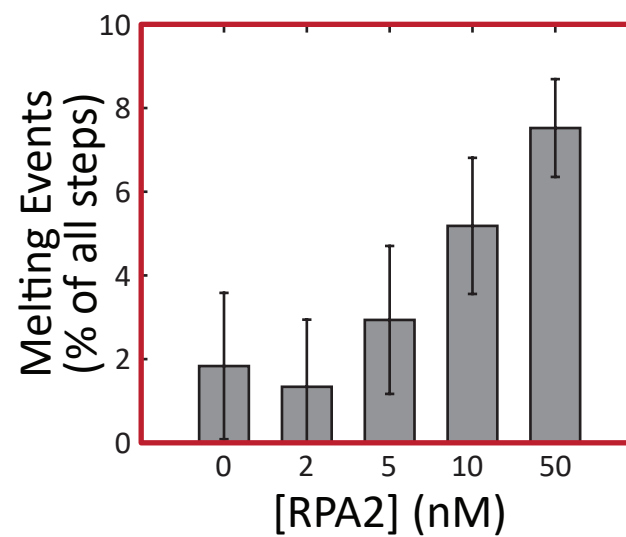

Supplement: supp [file elife-60515-supp-v1.zip › elife_poa_e60515_Figure_3_figure_supplement_2.pdf]

**a**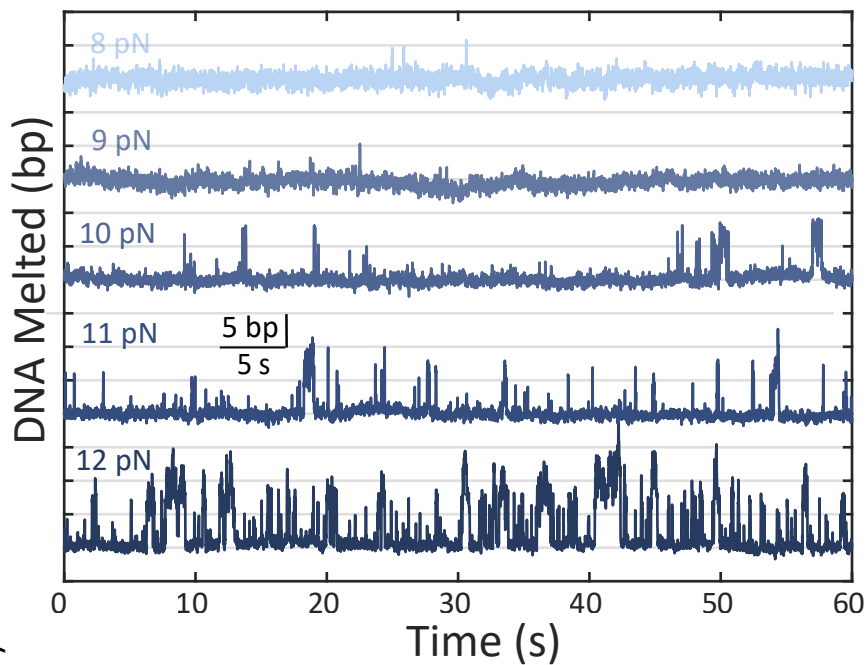**b**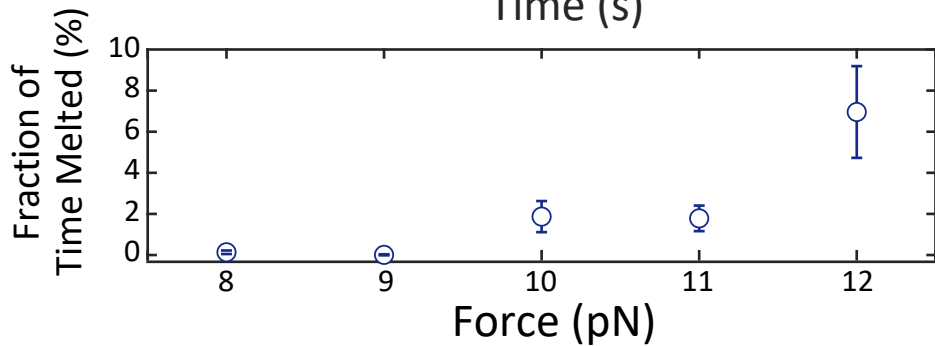

Supplement: supp [file elife-60515-supp-v1.zip › elife_poa_e60515_Figure_3_figure_supplement_3.pdf]

**a**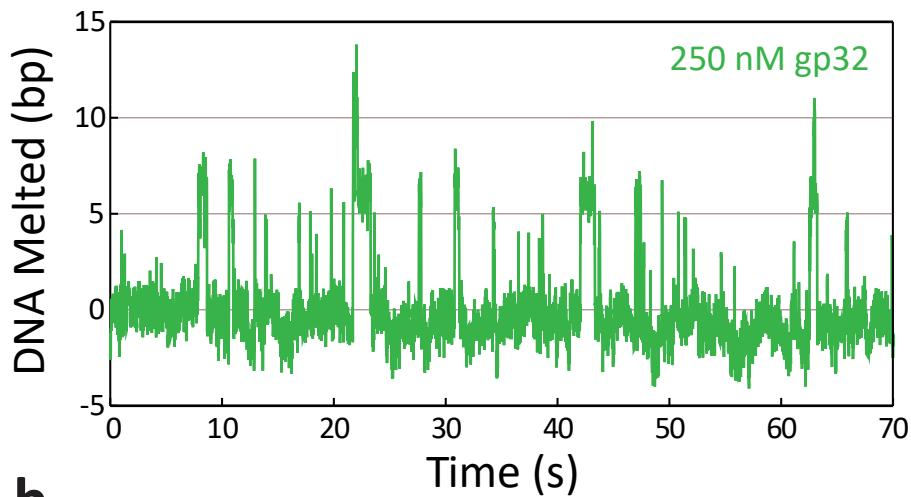**b**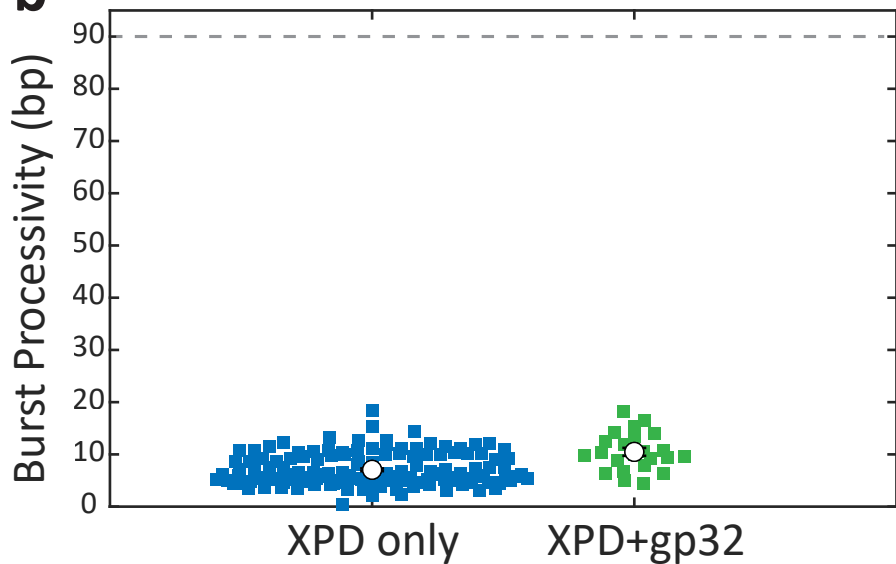

Supplement: supp [file elife-60515-supp-v1.zip › elife_poa_e60515_Figure_3_figure_supplement_4.pdf]

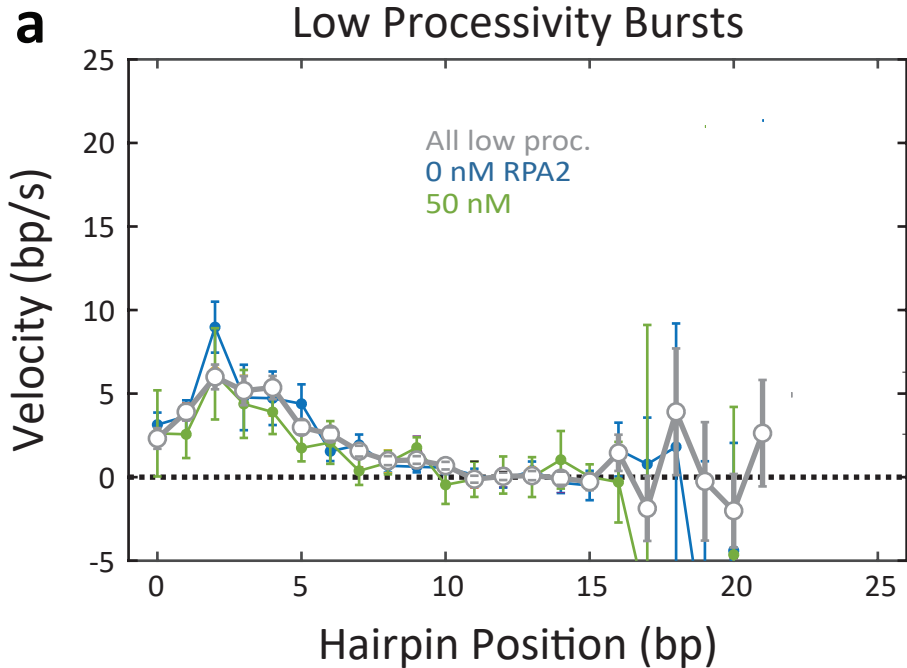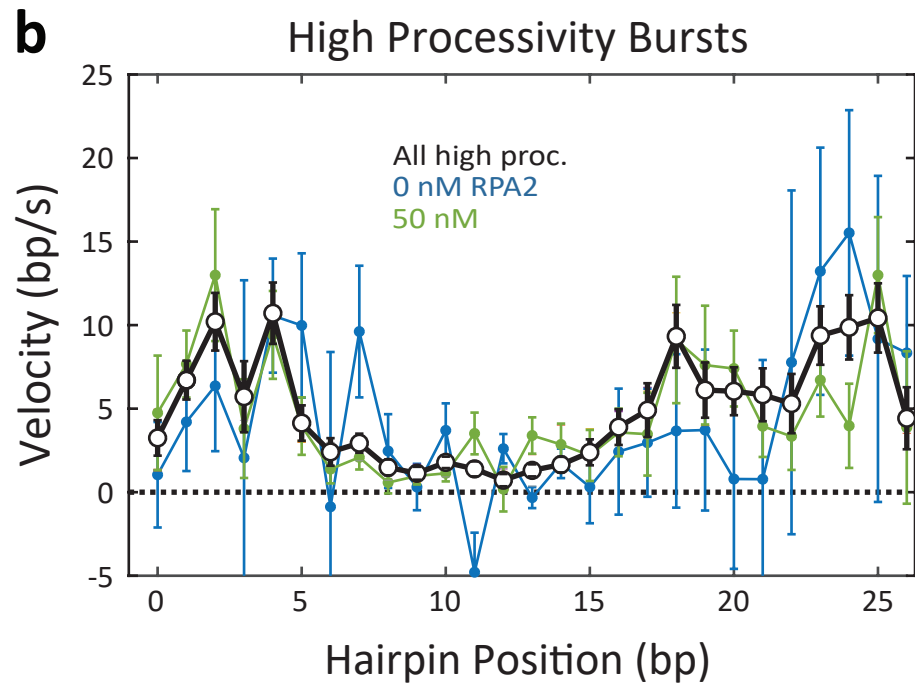

Supplement: supp [file elife-60515-supp-v1.zip › elife_poa_e60515_Figure_4_figure_supplement_1.pdf]

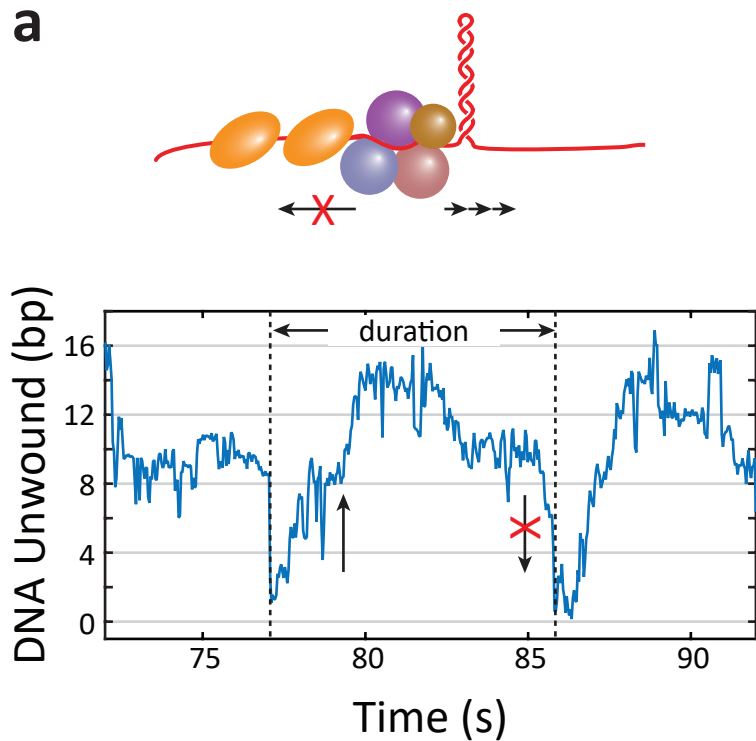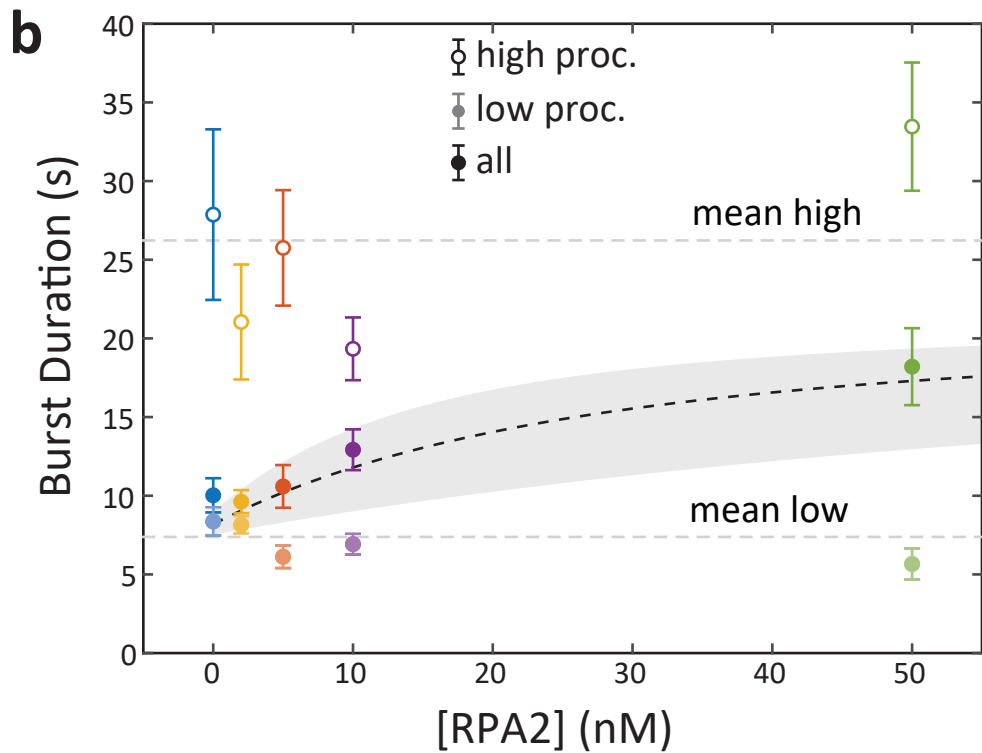

Supplement: supp [file elife-60515-supp-v1.zip › elife_poa_e60515_Figure_4_figure_supplement_2.pdf]

**a**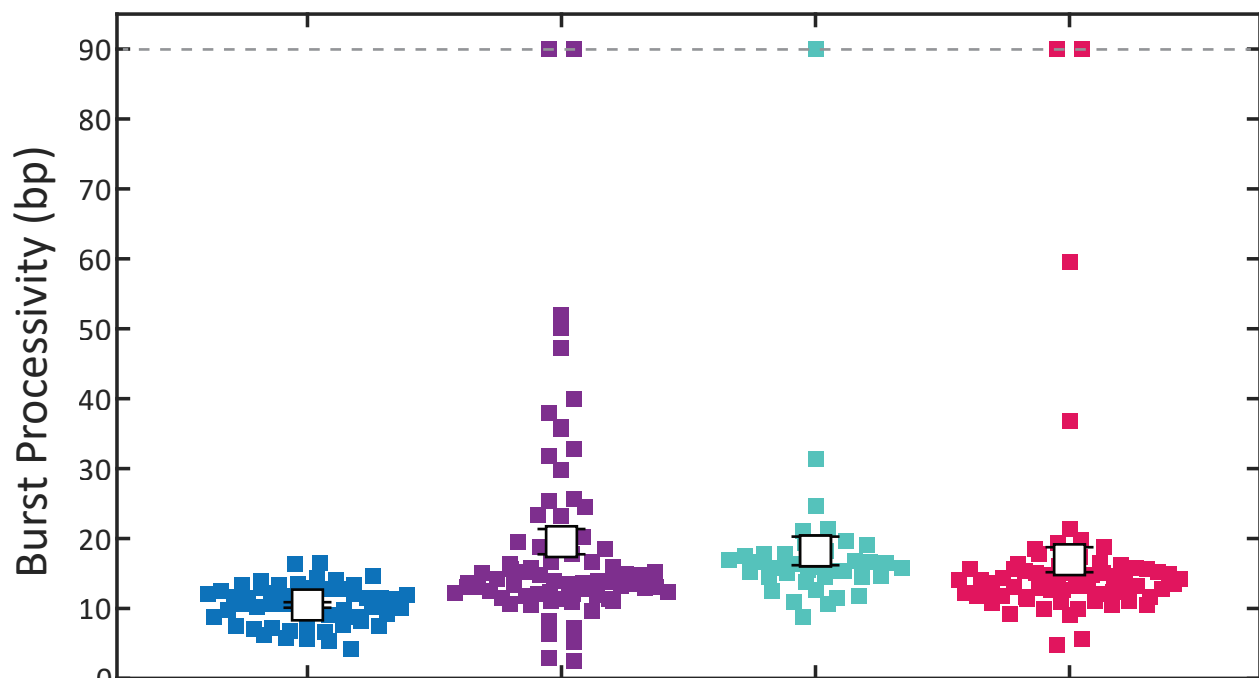**b**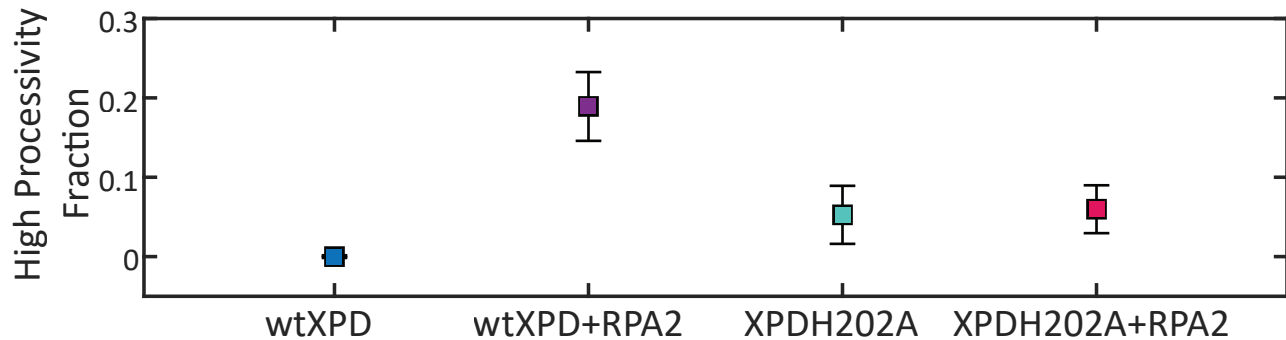

Supplement: supp [file elife-60515-supp-v1.zip › elife_poa_e60515_Figure_5_figure_supplement_1.pdf]

**a**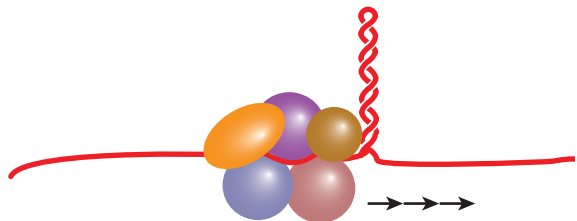**b**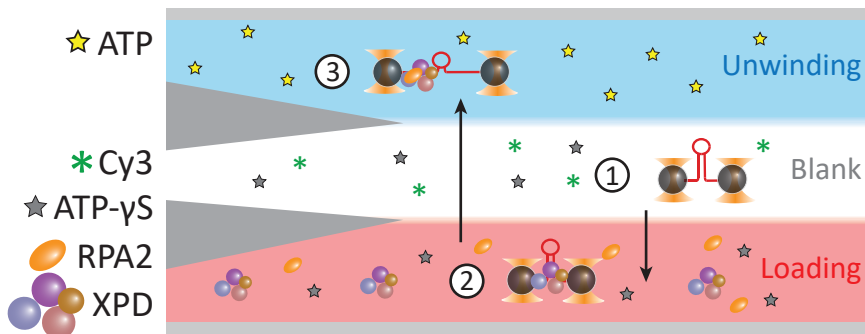**c**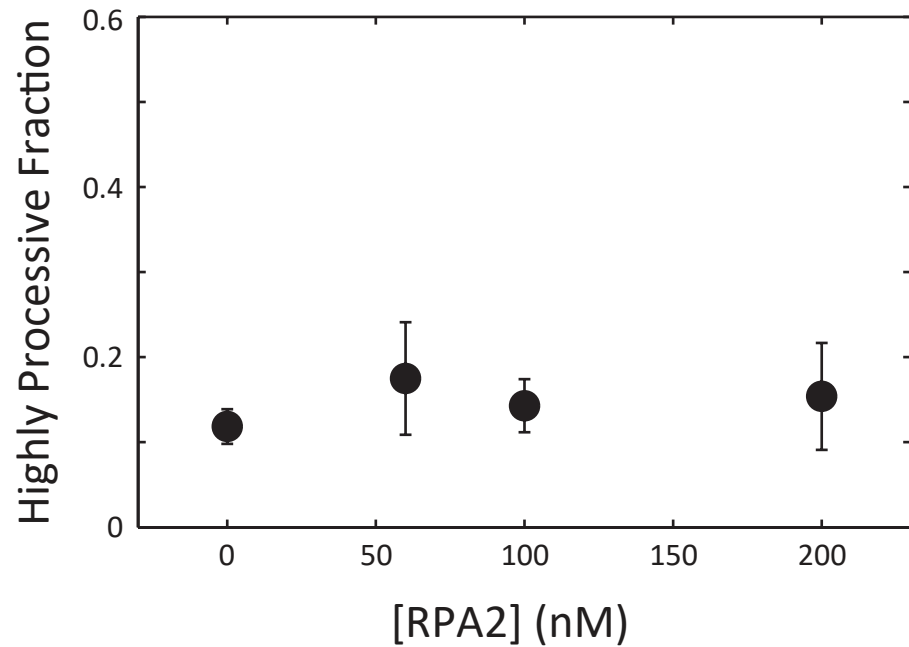

Supplement: supp [file elife-60515-supp-v1.zip › elife_poa_e60515_Figure_5_figure_supplement_2.pdf]
